# Supplementary material for: High-field/high-frequency EPR spectroscopy on synthetic melanin: on the origin of carbon-centered radicals
Source: Royal Society of Chemistry journal article supplement (doi:10.1039/d1ma00446h), 2021-01-01
Supplement: d1ma00446h1.pdf [file d1ma00446h1.pdf]

## SUPPORT INFORMATION

### **High-Field/High-Frequency EPR spectroscopy on synthetic melanin: on the origin of carbon-centered radicals**

J.V. Paulin<sup>a</sup>, A. Batagin-Neto<sup>a,b</sup>, B. Naydenov<sup>c</sup>, K. Lips<sup>c,d,e</sup>, C.F.O. Graeff<sup>a,f,\*</sup>

<sup>a</sup> São Paulo State University (UNESP), School of Sciences, Postgraduate Program in Science and Technology of Materials (POSMAT), Bauru, Brazil.

<sup>b</sup> São Paulo State University (UNESP), Campus of Itapeva, Itapeva, Brazil.

<sup>c</sup> Helmholtz-Zentrum Berlin für Materialien und Energie GmbH, Berlin, Germany.

<sup>d</sup> Freie Universität Berlin, Department Physics, Berlin, Germany.

<sup>e</sup> University of Utah, Department of Physics and Astronomy, Salt Lake City, USA.

<sup>f</sup> São Paulo State University (UNESP), School of Sciences, Department of Physics, Bauru, Brazil.

*Corresponding author:*

carlos.graeff@unesp.br (C.F.O. Graeff)

## Table of Contents

|                   |     |
|-------------------|-----|
| Figure S1 .....   | S3  |
| Figure S2 .....   | S4  |
| Figure S3 .....   | S4  |
| Figure S4 .....   | S5  |
| Figure S5 .....   | S6  |
| Figure S6 .....   | S7  |
| Figure S7 .....   | S8  |
| Figure S8 .....   | S9  |
| Figure S9 .....   | S9  |
| Figure S10 .....  | S10 |
| Figure S11 .....  | S10 |
| Figure S12 .....  | S10 |
| Figure S13 .....  | S11 |
| Figure S14 .....  | S11 |
| Figure S15 .....  | S11 |
| Figure SI-1 ..... | S14 |
| Figure SI-2 ..... | S15 |
| Figure SI-3 ..... | S16 |
| Figure SI-4 ..... | S16 |
| Table S1 .....    | S8  |
| Table S2 .....    | S12 |
| Table S3 .....    | S13 |

**SI-1. Possible melanin and sulfonated melanin radical species.**

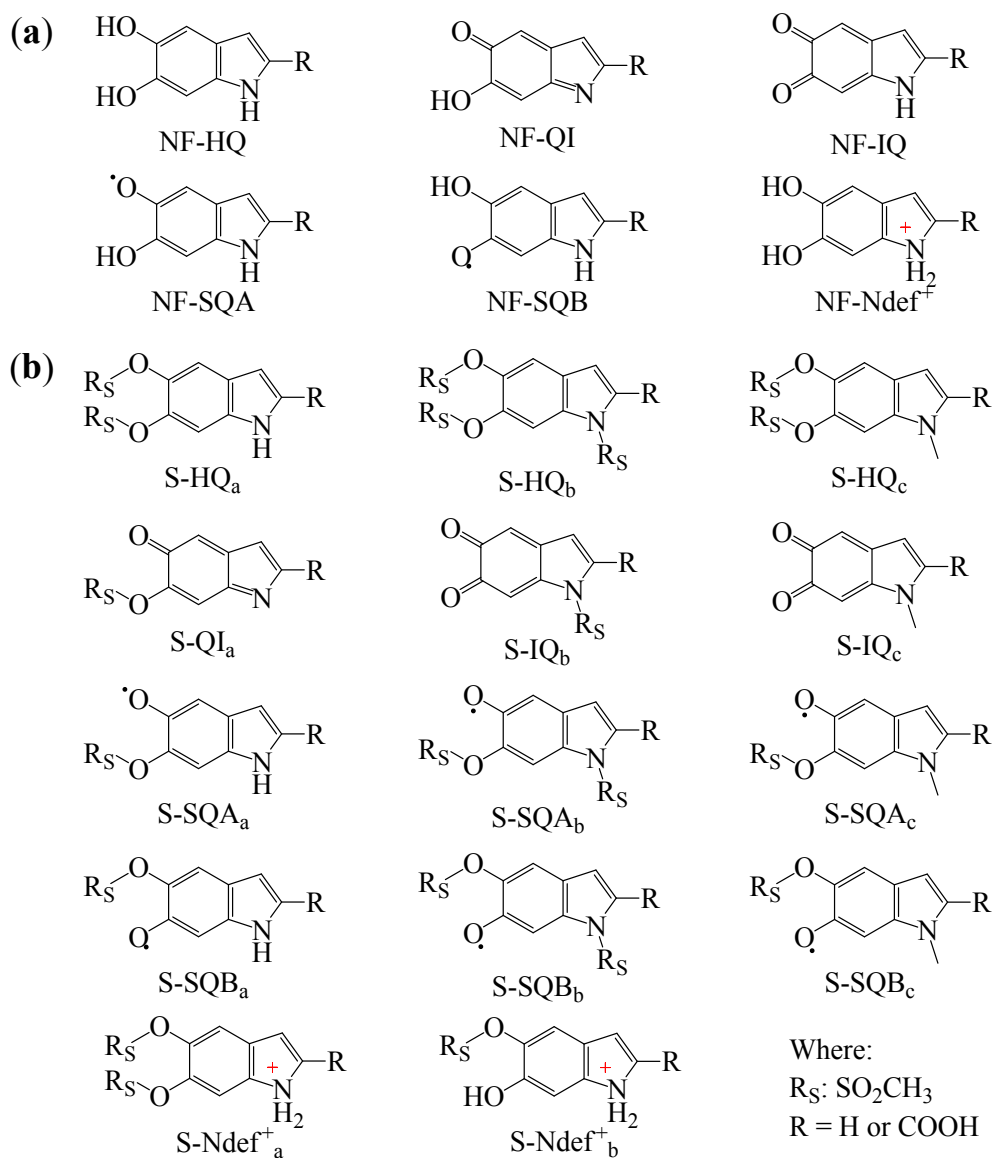

**Figure S1.** The different units of (a) NF-melanin and (b) S-Melanin.

## SI-2. Additional HFEPR analysis

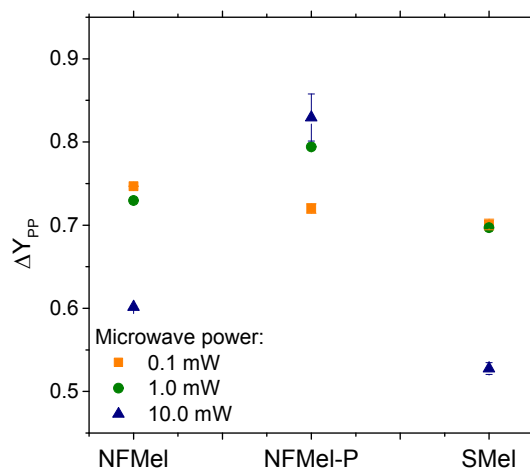

**Figure S2.** HFEPR signal symmetry ( $\Delta Y_{PP}$ ) of NFMel, NFMel-P, SMel.  $\Delta Y_{PP}$  is obtained from the ratio between positive and negative intensities and the closer it is to 1, the more symmetrical the signal is.

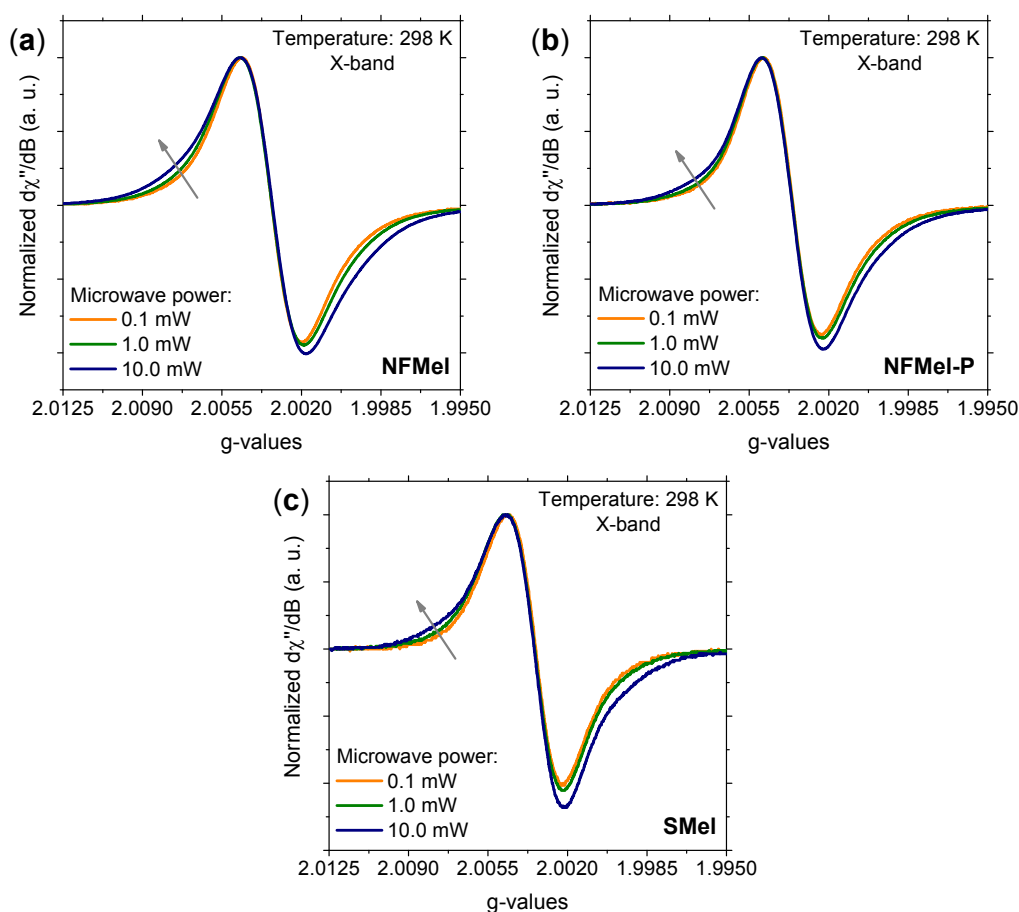

**Figure S3.** X-band EPR absorption signal of (a) NFMel, (b) NFMel-P and (c) SMel at different microwave powers. The gray arrow indicates the shoulder-like feature increases. Measurements performed in solid-state using an X-band spectrometer MiniScope MS300 (Magnettech) coupled with an Agilent Frequency Counter 53181A RF. For g calibration, it was used 2,2-diphenyl-1-picrylhydrazyl (DPPH,  $g = 2.0036$ ).

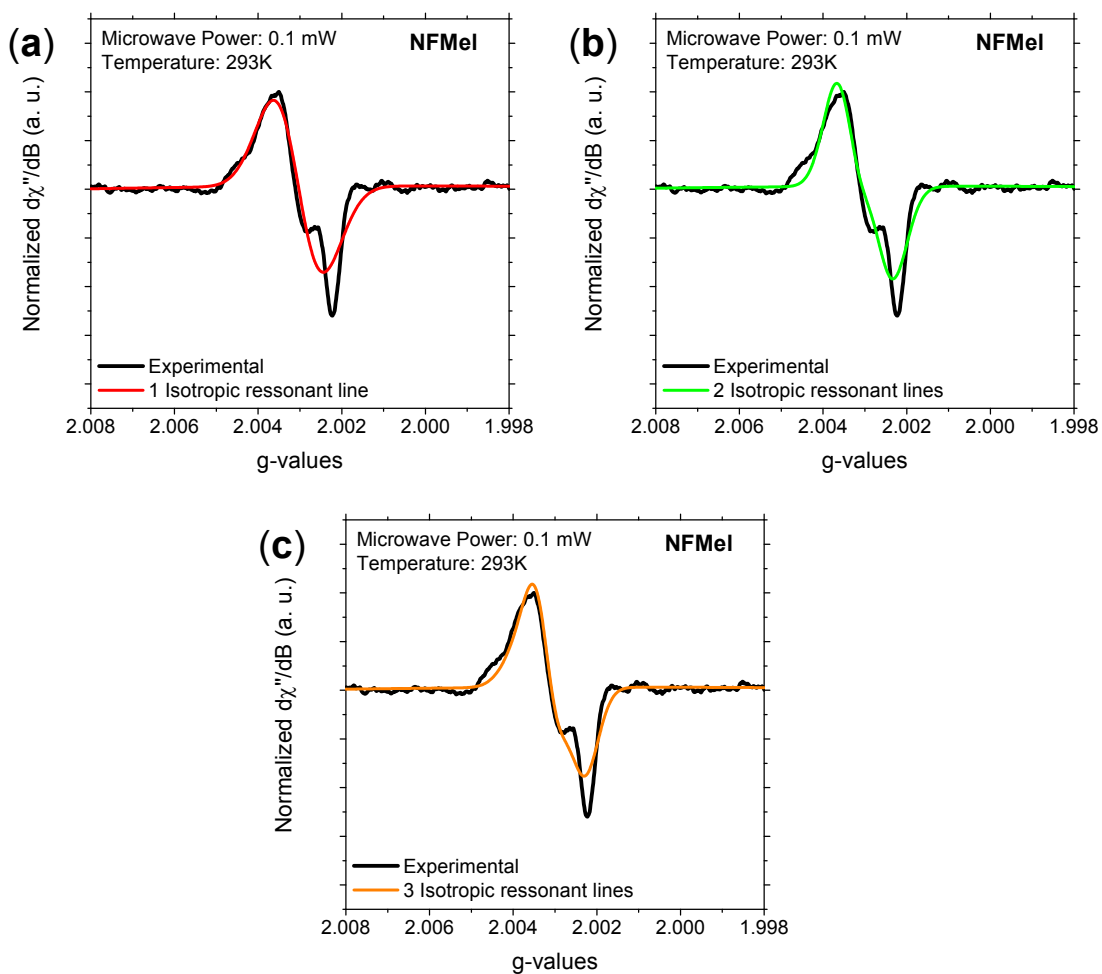

**Figure S4.** HFEPR absorption signal simulation of NFMel with different isotropic resonant lines at low microwave power (0.1 mW).

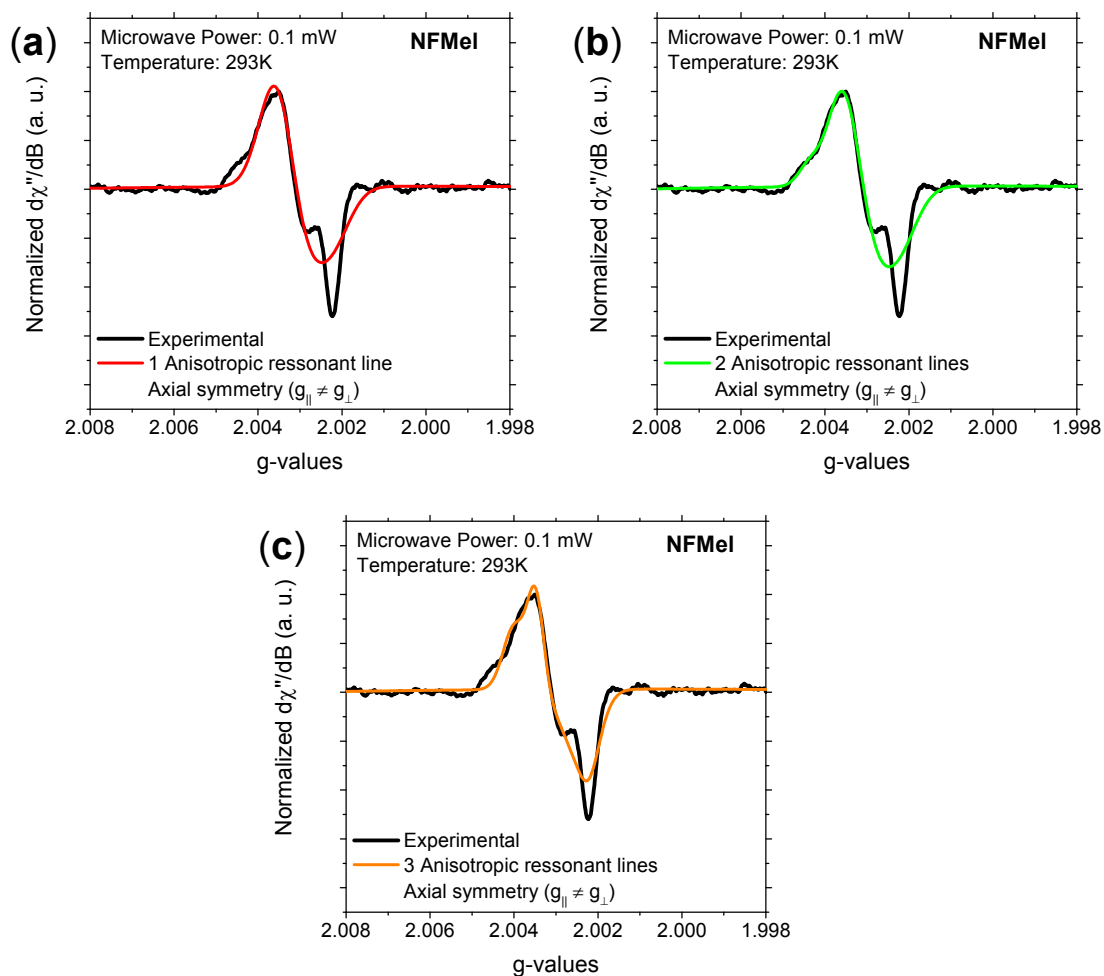

**Figure S5.** HFEPR absorption signal simulation of NFMel with different anisotropic resonant lines and axial symmetry at low microwave power (0.1 mW).

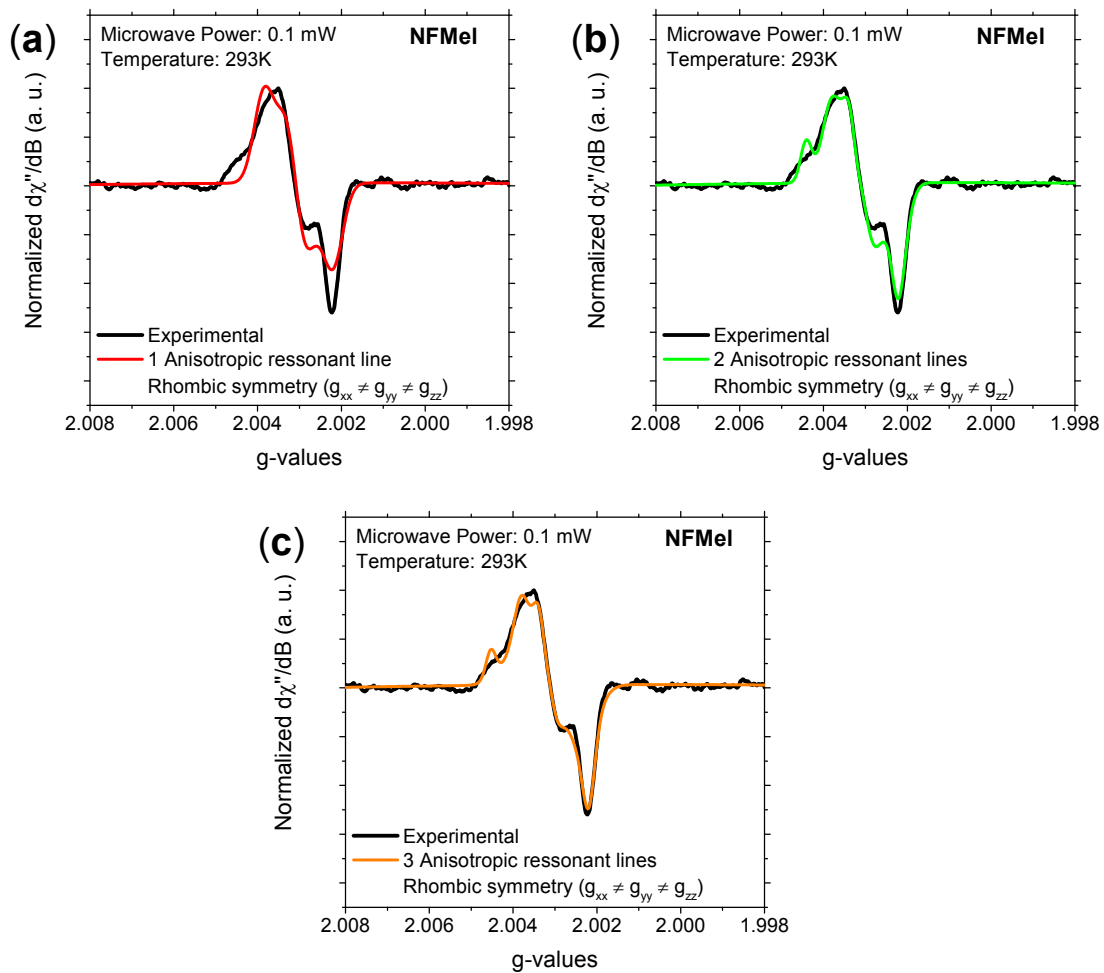

**Figure S6.** HFEPR absorption signal simulation of NFMel with different anisotropic resonant lines and rhombic symmetry (without  $g$  strain) at low microwave power (0.1 mW).

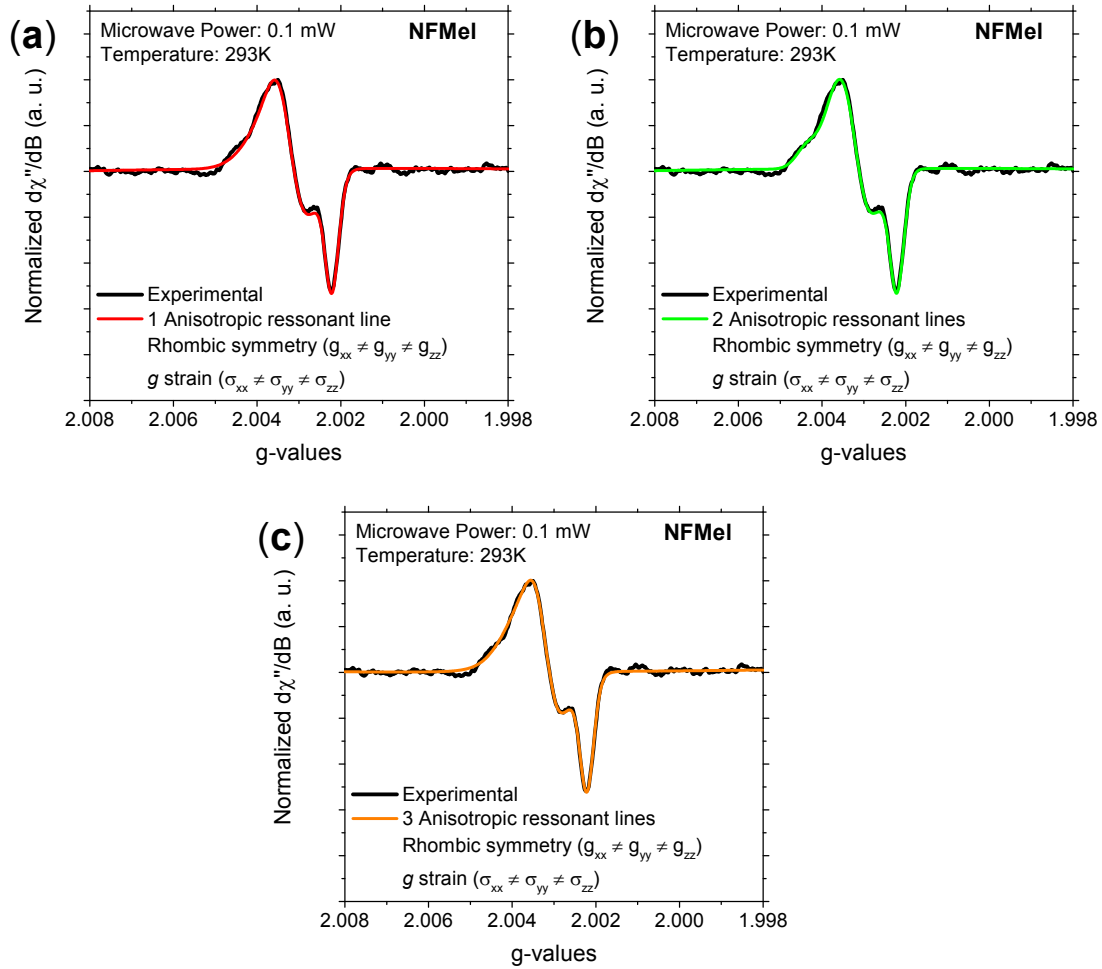

**Figure S7.** HFEPR absorption signal simulation of NFMel with different anisotropic resonant lines, rhombic symmetry and  $g$  strain at low microwave power (0.1 mW).

**Table S1.** Experimentally Determined  $g$ -Values for NFMel with Different Resonant Lines.

| Resonant Line | $g_{xx}$ | $g_{yy}$ | $g_{zz}$ | $g_{iso}$ |
|---------------|----------|----------|----------|-----------|
| A-I           | 2.0038   | 2.0033   | 2.0023   | 2.0031    |
| B-I           | 2.0043   | 2.0030   | 2.0023   | 2.0032    |
| B-II          | 2.0037   | 2.0032   | 2.0022   | 2.0030    |
| C-I           | 2.0050   | 2.0031   | 2.0023   | 2.0035    |
| C-II          | 2.0038   | 2.0033   | 2.0023   | 2.0031    |
| C-III         | 2.0038   | 2.0033   | 2.0022   | 2.0030    |



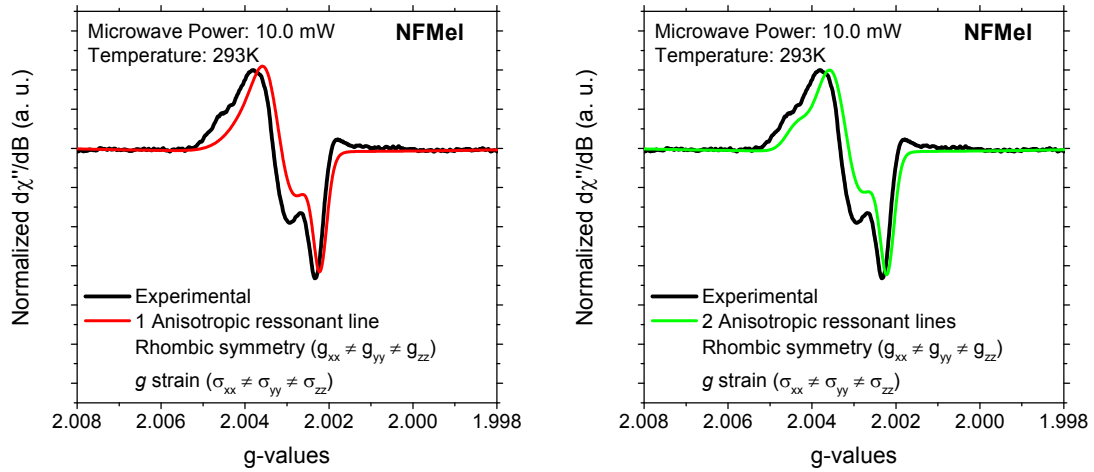

**Figure S8.** HFEPR absorption signal simulation of NFMel with different anisotropic resonant lines, rhombic symmetry and g strain at high microwave power (10.0 mW).

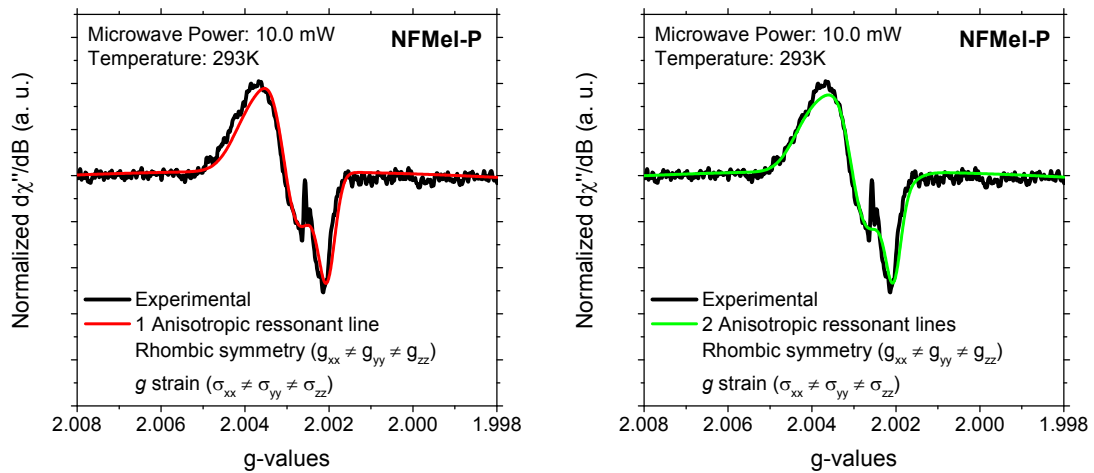

**Figure S9.** HFEPR absorption signal simulation of NFMel-P with different anisotropic resonant lines, rhombic symmetry and g strain at high microwave power (10.0 mW).

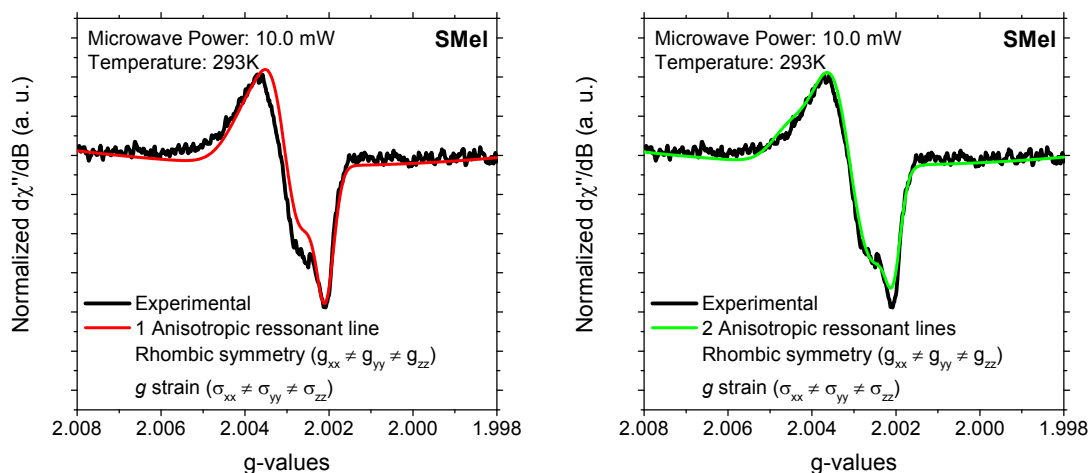

**Figure S10.** HFEPR absorption signal simulation of SMel with different anisotropic resonant lines, rhombic symmetry and g strain at high microwave power (10.0 mW).

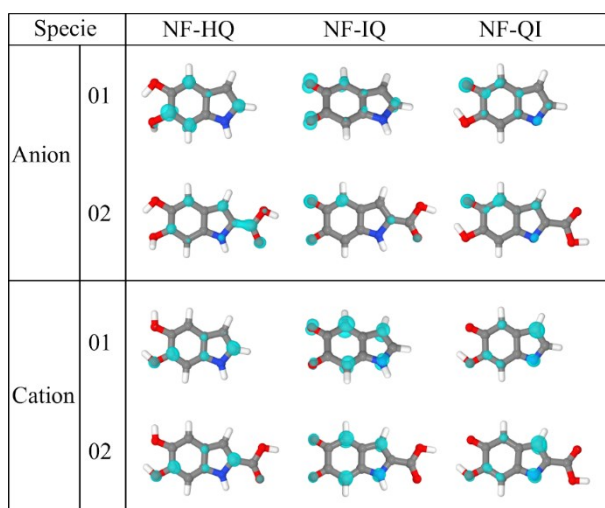

**Figure S11.** Spin density estimated for charged NF-Melanins.

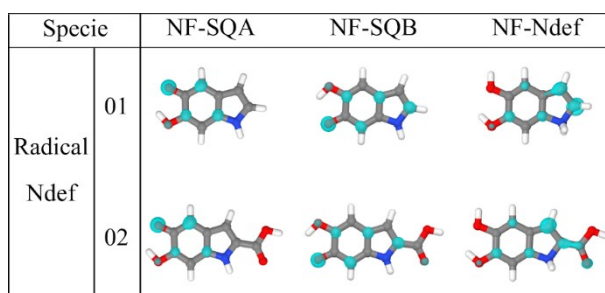

**Figure S12.** Spin density estimated for SQ radicals and Ndef structures of NF-Melanins.

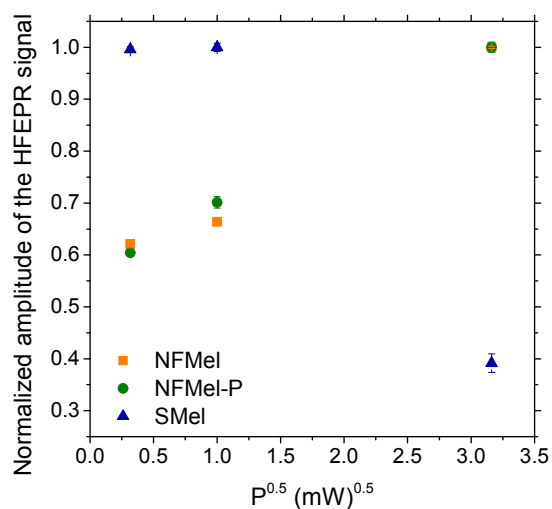

**Figure S13.** Normalized amplitude as a function of the square root of the power intensity for NFMel, NFMel-P and SMel.

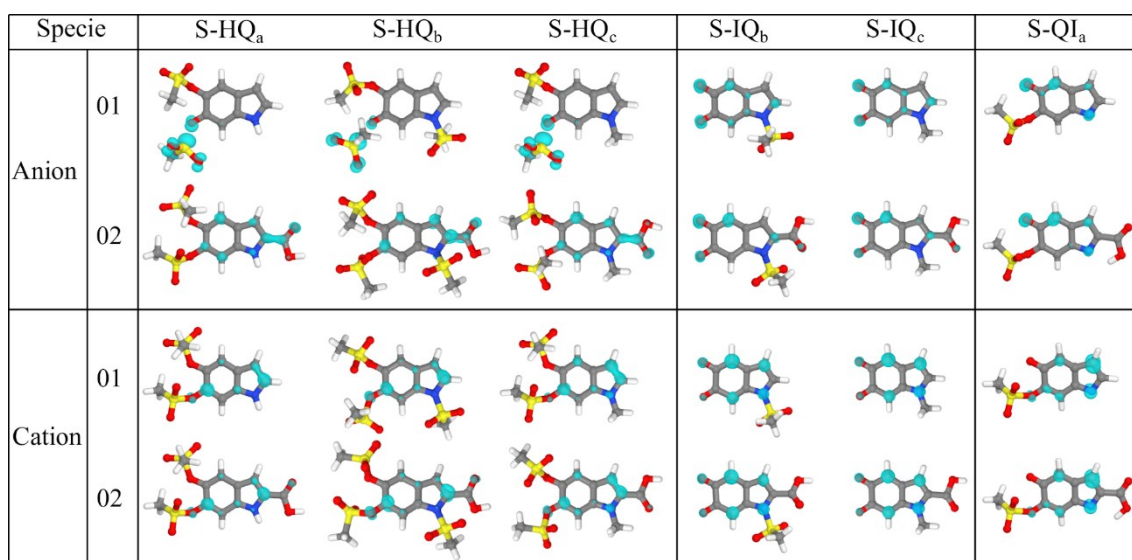

**Figure S14.** Spin density estimated for charged S-Melanins.

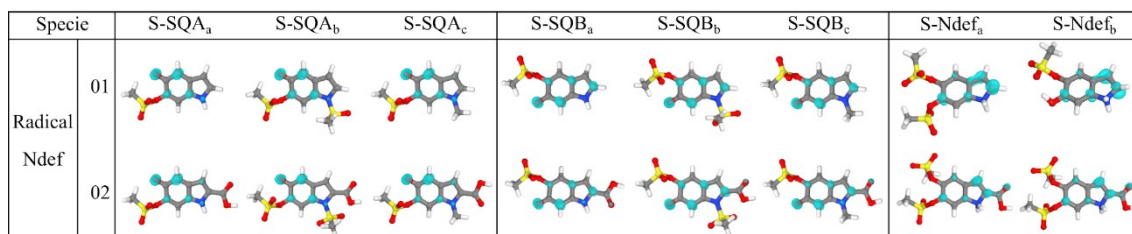

**Figure S15.** Spin density estimated for SQ radicals and Ndef structures of S-Melanins.

**Table S2.** Examples of Fitting Parameters of Melanin and Melanin Derivatives.

| Melanin sample                  | Frequency | Symmetry    |             | g Values      |               |             | Ref. |  |  |  |
|---------------------------------|-----------|-------------|-------------|---------------|---------------|-------------|------|--|--|--|
|                                 |           |             |             | Species I     | Species II    | Species III |      |  |  |  |
| Synthetic melanin (pH 12)       |           |             |             | 2.0054/2.0025 | 2.0054/2.0030 | #           |      |  |  |  |
| Synthetic melanin (pH 11)       |           |             |             | 2.0054/2.0024 | 2.0054/2.0030 | #           |      |  |  |  |
| Synthetic melanin (pH 9)        | 35 GHz    | Anisotropic | Axial       | 2.0054/2.0025 | 2.0044/2.0028 | #           | RS1  |  |  |  |
| Synthetic melanin (pH 6)        |           |             |             | 2.0052/2.0027 | 2.0043/2.0029 | #           |      |  |  |  |
| Synthetic melanin (pH 5)        |           |             |             | 2.0039/2.0025 | 2.0041/2.0029 | #           |      |  |  |  |
| Synthetic melanin (pH 3)        |           |             |             | 2.0039/2.0025 | 2.0042/2.0029 | #           |      |  |  |  |
| DHI-Melanin                     |           |             |             |               |               |             |      |  |  |  |
| DHICA-Melanin                   |           |             |             |               |               |             |      |  |  |  |
| Synthetic melanin               |           |             |             |               |               |             |      |  |  |  |
| Oxidized synthetic melanin      | 9.4 GHz   | Isotropic   | cylindrical | 2.0049        | 2.0038        | 2.0026      | RS2  |  |  |  |
| Synthetic melanin (pH acidic)   |           |             |             |               |               |             |      |  |  |  |
| Synthetic melanin (pH neutral)  |           |             |             |               |               |             |      |  |  |  |
| Synthetic melanin (pH alkaline) |           |             |             |               |               |             |      |  |  |  |
| Sulfonated melanin              |           |             |             |               |               |             |      |  |  |  |
| Oxidized sulfonated melanin     | 9.7 GHz   | Isotropic   | cylindrical | 2.0052        | 2.0043        | 2.0028      | RS3  |  |  |  |
| Synthetic melanin               |           |             |             | 2.0053        | 2.0043        | 2.0027      |      |  |  |  |
| Oxidized synthetic melanin      |           |             |             |               |               |             |      |  |  |  |

**Table S3.** EPR signal linewidth as a function of frequency.

| Frequency (GHz)                                                                               | $\Delta H_{PP}$ (mT) |             |       |        | Ref.      |
|-----------------------------------------------------------------------------------------------|----------------------|-------------|-------|--------|-----------|
|                                                                                               | 9.40                 | 35.00       | 94.04 | 263.00 |           |
| <b>Melanin samples</b>                                                                        |                      |             |       |        |           |
| <b>Natural melanin</b><br>(Bovine eye & amphiuma liver)                                       | #                    | 1.78 ± 0.09 | #     | #      | RS4       |
| <b>Hair melanin</b>                                                                           | #                    | #           | 4.48  | #      | RS5       |
| <b>Dopa-melanin (pH 3)</b>                                                                    | #                    | 0.82        | #     | #      | RS1       |
| <b>Dopa-melanin (pH 12)</b>                                                                   | #                    | 0.57        | #     | #      | RS1       |
| <b>Synthetic melanin</b><br>(Dopa, dopamine,<br>nerepinebeohrine,<br>serotoninm & tryptamine) | #                    | 1.80 ± 0.19 | #     | #      | RS4       |
| <b>5-S-cysteinyldopa melanin</b>                                                              | #                    | #           | 6.45  | #      | RS6       |
| <b>NFMel-S</b>                                                                                | 0.45                 | #           | #     | 6.33   | This work |
| <b>NFMel-6P</b>                                                                               | 0.43                 | #           | #     | 7.16   | This work |
| <b>Sulfonated melanin</b>                                                                     | 0.41                 | #           | #     | 6.88   | This work |

### SI-3. Procedure for baseline and phase correction.

Initially, to facilitate the understanding of the process, we create a hypothetical absorption spectrum from  $A = \exp\left[-\frac{(1-x)^2}{0.005^2}\right]$ , Figure SI-1a, as example. The Hilbert transform of the absorption  $A$  spectrum was used to obtain the dispersion signal  $D$ . We usually measure the absorption's first derivative. Hence, Figure SI-1b presents the first derivative of the absorption ( $A'$ ) and the first derivative of the dispersion ( $D'$ ).

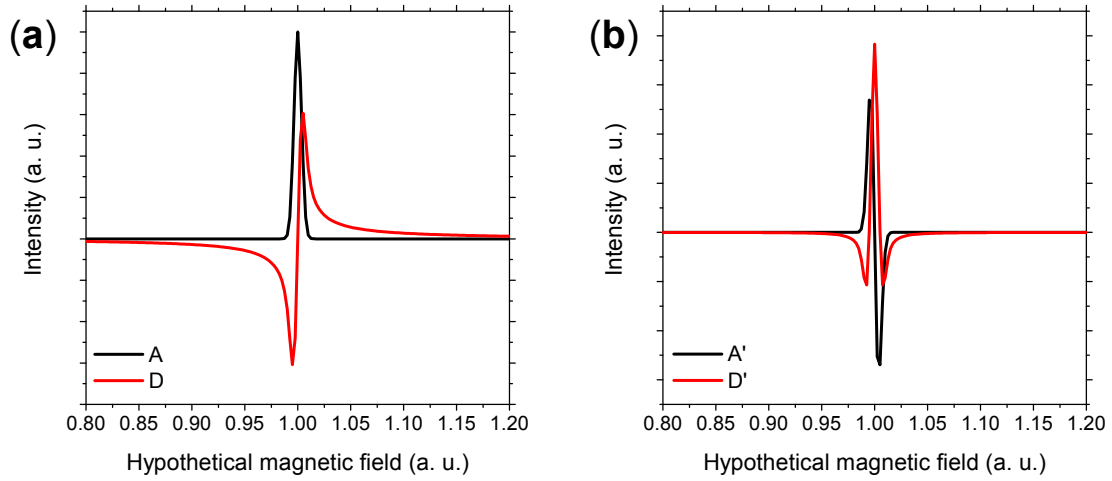

**Figure SI-1.** (a) Hypothetical absorption  $A$  and dispersion  $D$  spectra. (b) The first derivative of the signs in (a).

Figure SI-1 shows the *pure* spectra. However, in our experimental case, there is the possibility that the spectra are a mixture of both absorption and dispersion. Therefore, we create a hypothetical experimental spectrum  $S$  by taking a linear of  $A'$  and  $D'$  (I). Additionally, the Hilbert transform of  $S$  (named  $H$ ) is given by (II).

$$S = A' + \alpha D' \quad (\text{I})$$

$$H = D' + \alpha A' \quad (\text{II})$$

Figure SI-2 shows the resulted spectra for  $S$  and  $H$  considering  $\alpha = 0.5$ .

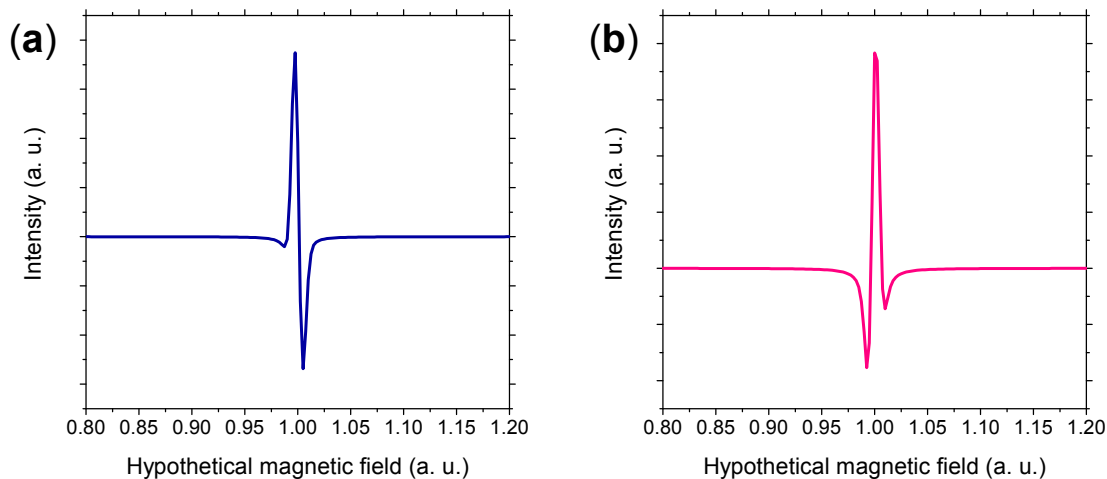

**Figure SI-2.** (a) Hypothetical experimental spectra  $S$ , with  $\alpha = 0.5$ , and its (b) Hilbert transform  $H$ .

As we intend to do a phase correction to obtain a pure absorption (or its first derivative) of the *experimental* spectra, we need to discover  $\alpha$ . Following the methodology reference from Earle *et al.* (RS7), we need to take a linear combination of the  $S$  and  $H$ . In this case, we got:

$$\begin{aligned}
 C &= S + \beta H \\
 &\quad \downarrow \\
 C &= (1 - \alpha \beta) A' + (\alpha + \beta) D'
 \end{aligned} \tag{III}$$

If,

$$\alpha \beta = 1 \Leftrightarrow \beta = \frac{1}{\alpha} \tag{IV}$$

then,  $C$  is proportional to only  $D'$ . This means that for an arbitrary value of  $\beta$ , the double integration of  $C$  results in a total area other than zero due to the term  $A'$ . However, for  $\beta = \alpha^{-1}$  the term  $A'$  disappears and the double integration results in zero total area because  $D'$  has an equal zero area. The double integration of the linear combination of  $C$  is present in Figure SI-3. As can be seen, only  $\beta = 2$  results in a flat and zero baseline, as expected by  $\alpha = 0.5$ .

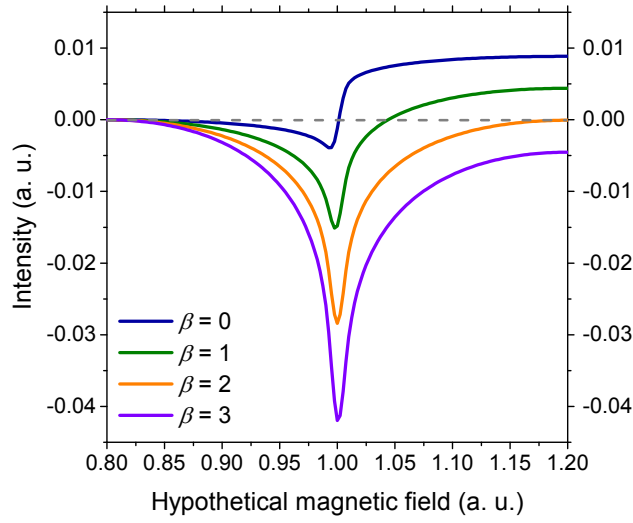

**Figure SI-3.** Double integration of  $C$  for different values of  $\beta$ .

As a real example, we applied the above procedure in an experimental NFMel HFEPD dispersion spectrum ( $S_{NFMel}$ ) and its calculated Hilbert transform ( $H_{NFMel}$ ), see Figure SI-4(a). We then take a linear combination of  $S_{NFMel}$  and  $H_{NFMel}$  following Eq. III. The double integration of the linear combination of  $C_{NFMel}$  with different values of  $\beta$  is shown in Figure SI-4(b).

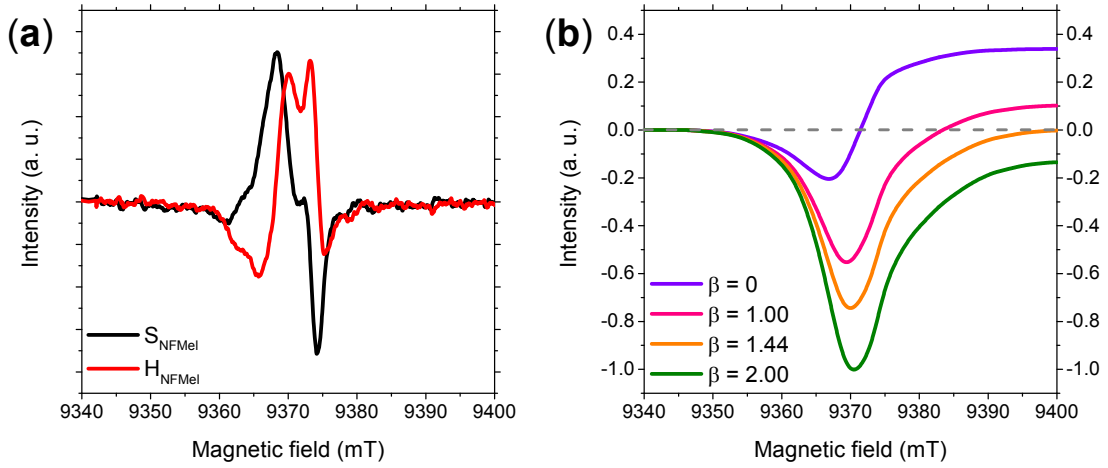

**Figure SI-4.** (a) Dispersion HFEPD experimental spectrum ( $S_{NFMel}$ ) and its Hilbert transform ( $H_{NFMel}$ ). (b) Double integration of  $C$  for different values of  $\beta$ .

Based on Figure SI-4, it is possible to observe that a flat and zero baseline is obtained with  $\beta = 1.44$ . This implies that, considering relation from Eq. IV,  $\alpha = 0.69$ . Thus, with relation in Eq I, we can get the phase-corrected HFEPD experimental spectrum.



## REFERENCES

- RS1 - Pasenkiewicz-Gierula, M.; Sealy, R. C. Analysis of the ESR Spectrum of Synthetic Dopa Melanin. *Biochim. Biophys. Acta* 1986, **884**, 510–516.
- RS2 - Paulin, J. V.; Batagin-Neto, A.; Graeff, C. F. O. Identification of Common Resonant Lines in the EPR Spectra of Melanins. *J. Phys. Chem. B* 2019, **123**, 1248–1255.
- RS3 - Paulin, J. V.; Batagin-Neto, A.; Meredith, P.; Graeff, C. F. O.; Mostert, A. B. Shedding Light on the Free Radical Nature of Sulfonated Melanins. *J. Phys. Chem. B* 2020, **124**, 10365–10373.
- RS4 - Grady, F. J.; Borg, D. C. Electron Paramagnetic Resonance Studies on Melanins. I. The Effect of PH on Spectra at Q Band. *J. Am. Chem. Soc.* 1968, **90**, 2949–2952.
- RS5 - Tipikin, D. S.; Swarts, S. G.; Sidabras, J. W.; Trompier, F.; Swartz, H. M. Possible Nature of the Radiation-Induced Signal in Nails: High-Field EPR, Confirming Chemical Synthesis, and Quantum Chemical Calculations. *Radiat. Prot. Dosimetry* 2016, **172**, 112–120.
- RS6 - Zadlo, A.; Szewczyk, G.; Sarna, M.; Camenisch, T. G.; Sidabras, J. W.; Ito, S.; Wakamatsu, K.; Sagan, F.; Mitoraj, M.; Sarna, T. Photobleaching of Pheomelanin Increases Its Phototoxic Potential: Physicochemical Studies of Synthetic Pheomelanin Subjected to Aerobic Photolysis. *Pigment Cell Melanoma Res.* 2019, **32**, 359–372.
- RS7 - Earle, K. A.; Budil, D. E.; Freed, J. H. 250-GHz EPR of Nitroxides in the Slow-Motional Regime: Models of Rotational Diffusion. *J. Phys. Chem.* 1993, **97**, 13289–13297.
